# Supplementary figures and images for: Low Levels of Circulating Estrogen Sensitize PTEN-Null Endometrial Tumors to PARP Inhibition In Vivo
Source: Oxford University Press journal article supplement (doi:10.1158/1535-7163.mct-13-0572), 2013-11-12

Supplementary Figure S4

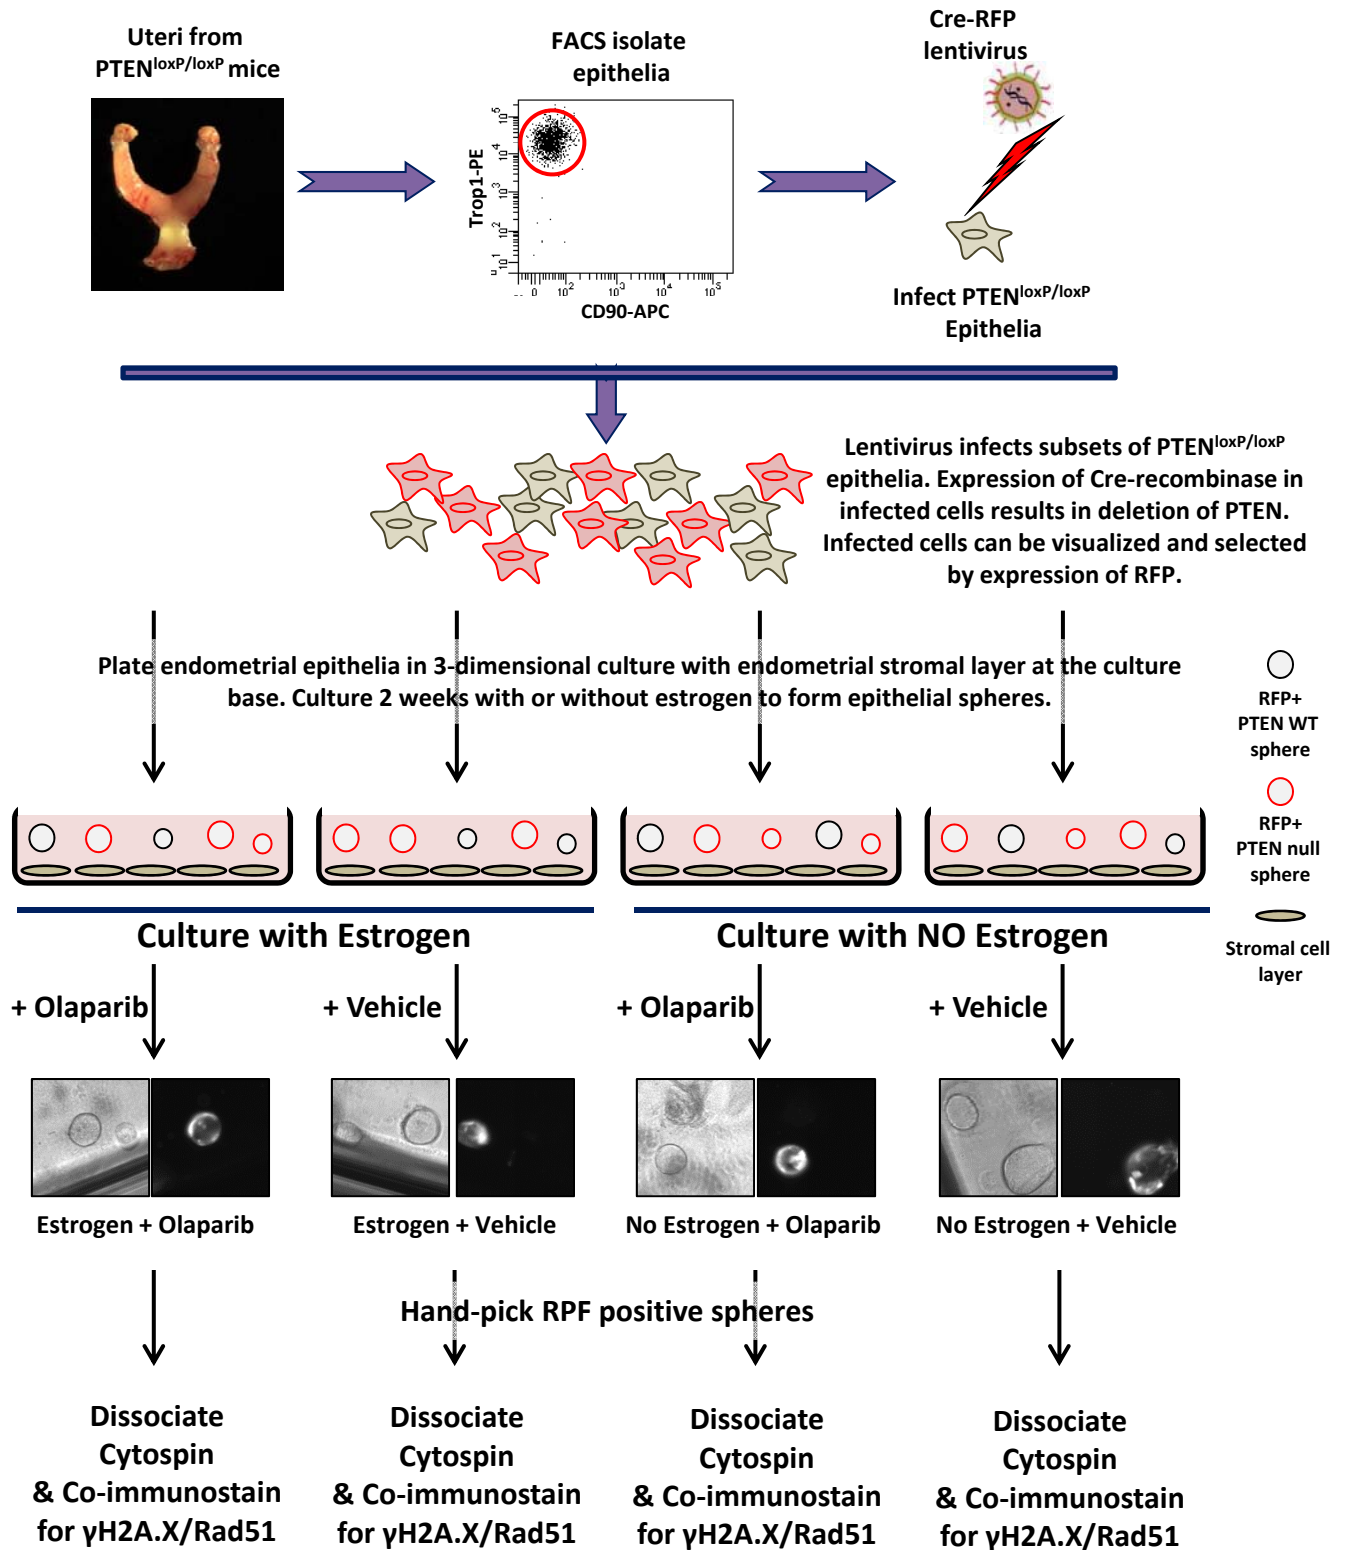

Supplement: 15357163mct130572-sup-fig4.pdf [file 15357163mct130572-sup-fig4.pdf]
